# Supplementary material for: Disparities in food access around homes and schools for New York City children
Source: PubMed Central journal article supplement (PMC6561543; doi:10.1371/journal.pone.0217341), 2019-06-12
Supplement: pone.0217341.s002.pdf [file pone.0217341.s002.pdf]

**S2 Table.** Mean count within 0.25 miles of food facilities from home and school, race and poverty interactions, AY2013

|                      |        | Overall       | Not low-income |               |               |               | Low-income    |               |                |               |
|----------------------|--------|---------------|----------------|---------------|---------------|---------------|---------------|---------------|----------------|---------------|
|                      |        | Total         | White          | Black         | Hispanic      | Asian         | White         | Black         | Hispanic       | Asian         |
| Corner stores        | Home   | 15.65<br>(13) | 7.72<br>(8)    | 10.75<br>(10) | 14.18<br>(12) | 14.19<br>(17) | 9.55<br>(10)  | 14.27<br>(11) | 19.90<br>(13)  | 15.42<br>(16) |
|                      | School | 13.79<br>(13) | 8.15<br>(9)    | 10.75<br>(10) | 13.86<br>(13) | 14.96<br>(20) | 8.36<br>(9)   | 13.33<br>(11) | 17.02<br>(13)  | 11.94<br>(15) |
| Fast-food outlets    | Home   | 17.31<br>(19) | 18.88<br>(27)  | 12.95<br>(16) | 19.09<br>(22) | 21.80<br>(30) | 12.46<br>(17) | 13.47<br>(12) | 19.61<br>(160) | 19.05<br>(24) |
|                      | School | 19.01<br>(23) | 19.61<br>(26)  | 15.87<br>(21) | 20.98<br>(24) | 23.65<br>(34) | 13.02<br>(19) | 17.05<br>(20) | 21.50<br>(23)  | 17.82<br>(25) |
| Wait-service outlets | Home   | 8.02<br>(16)  | 16.03<br>(26)  | 4.67<br>(12)  | 10.92<br>(18) | 16.09<br>(29) | 7.58<br>(15)  | 3.00<br>(7)   | 7.84<br>(11)   | 11.47<br>(21) |
|                      | School | 10.43<br>(20) | 17.42<br>(27)  | 8.59<br>(20)  | 13.54<br>(22) | 17.75<br>(31) | 8.24<br>(17)  | 7.22<br>(17)  | 10.78<br>(19)  | 10.77<br>(20) |
| Any supermarkets     | Home   | 1.19<br>(1)   | 1.16<br>(2)    | 0.92<br>(1)   | 1.20<br>(1)   | 1.23<br>(2)   | 0.79<br>(1)   | 1.07<br>(1)   | 1.39<br>(1)    | 1.16<br>(1)   |
|                      | School | 1.13<br>(1)   | 1.22<br>(2)    | 0.99<br>(1)   | 1.18<br>(1)   | 1.21<br>(2)   | 0.69<br>(1)   | 1.11<br>(1)   | 1.29<br>(1)    | 0.92<br>(1)   |
| N                    |        | 789 520       | 55 600         | 15 349        | 22 989        | 26 104        | 68 274        | 190 525       | 304 231        | 106 447       |

**Notes:** Sample includes NYC public school students in districts 1-32 with home and school address data and student-level demographic data. Students for whom a substantial proportion of their food environment lies outside of the city boundaries (those whose home or school is within half a mile from city borders) are excluded. For both home and school measurements, we conducted joint F-tests, which suggest significant differences ( $p < 0.05$ ), and pair-wise T-tests for multiple comparisons based on Bonferroni correction (28 pairs in total, with each pair tested on all four food outlets, separately). The majority of comparisons for home

measurements were statistically significant ( $p < 0.05$ ) while for the school measurements, more often than not, the results indicated no statistically significant difference. S18 and S19 Tables present the T-test results (p-values), respectively.
