# Supplementary material for: Disparities in food access around homes and schools for New York City children
Source: PubMed Central journal article supplement (PMC6561543; doi:10.1371/journal.pone.0217341), 2019-06-12
Supplement: pone.0217341.s003.pdf [file pone.0217341.s003.pdf]

**S3 Table.** Mean count within 0.10 miles of food facilities from home and school, race and poverty interactions, AY2013

|                      |        | Overall    | Not low-income |        |          |        | Low-income |         |          |         |
|----------------------|--------|------------|----------------|--------|----------|--------|------------|---------|----------|---------|
|                      |        | Total      | White          | Black  | Hispanic | Asian  | White      | Black   | Hispanic | Asian   |
| Corner stores        | Home   | 2.09       | 1.34           | 1.68   | 1.85     | 3.02   | 1.89       | 2.07    | 1.85     | 3.24    |
|                      |        | (4)        | (3)            | (3)    | (3)      | (6)    | (3)        | (3)     | (4)      | (6)     |
|                      | School | 3.14       | 1.91           | 2.36   | 2.89     | 3.62   | 1.77       | 3.05    | 3.85     | 2.84    |
|                      |        | (4)        | (3)            | (3)    | (4)      | (6)    | (3)        | (3)     | (4)      | (4)     |
| Fast-food outlets    | Home   | 2.33       | 3.19           | 1.96   | 2.61     | 4.19   | 2.25       | 1.95    | 1.86     | 3.46    |
|                      |        | (5)        | (7)            | (4)    | (6)      | (9)    | (5)        | (4)     | (4)      | (7)     |
|                      | School | 4.12       | 4.30           | 3.45   | 4.40     | 5.34   | 2.63       | 3.71    | 4.68     | 3.85    |
|                      |        | (6)        | (7)            | (6)    | (7)      | (9)    | (5)        | (6)     | (6)      | (7)     |
| Wait-service outlets | Home   | 1.21       | 2.65           | 0.75   | 1.68     | 3.37   | 1.38       | 0.36    | 0.89     | 2.24    |
|                      |        | (4)        | (7)            | (3)    | (5)      | (9)    | (4)        | (2)     | (3)      | (6)     |
|                      | School | 2.30       | 4.09           | 1.94   | 2.85     | 4.33   | 1.69       | 1.57    | 2.29     | 2.58    |
|                      |        | (5)        | (7)            | (5)    | (6)      | (9)    | (4)        | (4)     | (5)      | (6)     |
| Any supermarkets     | Home   | 0.14       | 0.17           | 0.13   | 0.14     | 0.21   | 0.13       | 0.15    | 0.11     | 0.19    |
|                      |        | (0)        | (0)            | (0)    | (0)      | (1)    | (0)        | (0)     | (0)      | (1)     |
|                      | School | 0.24       | 0.24           | 0.18   | 0.27     | 0.23   | 0.14       | 0.23    | 0.30     | 0.17    |
|                      |        | (1)        | (1)            | (0)    | (1)      | (1)    | (0)        | (1)     | (1)      | (0)     |
|                      | N      | 789<br>520 | 55 600         | 15 349 | 22 989   | 26 104 | 68 274     | 190 525 | 304 231  | 106 447 |

**Notes:** Sample includes NYC public school students in districts 1-32 with home and school address data and student-level demographic data. Students for whom a substantial proportion of their food environment lies outside of the city boundaries (those whose home or school is within half a mile from city border are excluded).
