# Supplementary material for: Disparities in food access around homes and schools for New York City children
Source: PubMed Central journal article supplement (PMC6561543; doi:10.1371/journal.pone.0217341), 2019-06-12
Supplement: pone.0217341.s004.pdf [file pone.0217341.s004.pdf]

**S4 Table.** Mean count within 0.50 miles of food facilities from home and school, race and poverty interactions, AY2013

|                      |        | Overall       | Not low-income |               |               |               | Low-income    |               |               |               |
|----------------------|--------|---------------|----------------|---------------|---------------|---------------|---------------|---------------|---------------|---------------|
|                      |        | Total         | White          | Black         | Hispanic      | Asian         | White         | Black         | Hispanic      | Asian         |
| Corner stores        | Home   | 48.97<br>(24) | 25.76<br>(28)  | 36.00<br>(34) | 45.00<br>(45) | 44.06<br>(27) | 30.30<br>(30) | 46.23<br>(35) | 60.77<br>(41) | 48.17<br>(36) |
|                      | School | 45.80<br>(24) | 26.98<br>(29)  | 36.21<br>(34) | 45.07<br>(48) | 44.65<br>(26) | 28.99<br>(31) | 45.29<br>(35) | 56.13<br>(38) | 39.42<br>(35) |
| Fast-food outlets    | Home   | 57.15<br>(85) | 64.03<br>(46)  | 45.01<br>(63) | 62.82<br>(88) | 72.18<br>(50) | 41.15<br>(35) | 46.38<br>(43) | 62.63<br>(68) | 64.29<br>(53) |
|                      | School | 66.47<br>(84) | 70.14<br>(68)  | 58.35<br>(73) | 70.77<br>(91) | 75.99<br>(61) | 47.44<br>(68) | 61.48<br>(72) | 73.15<br>(76) | 64.83<br>(73) |
| Wait-service outlets | Home   | 26.64<br>(79) | 52.55<br>(37)  | 16.14<br>(54) | 35.76<br>(79) | 50.64<br>(42) | 24.61<br>(22) | 11.24<br>(33) | 25.76<br>(57) | 38.13<br>(45) |
|                      | School | 36.36<br>(80) | 57.28<br>(59)  | 29.94<br>(65) | 44.56<br>(83) | 55.08<br>(52) | 29.26<br>(56) | 26.33<br>(60) | 37.54<br>(64) | 39.11<br>(62) |
| Any supermarkets     | Home   | 3.82<br>(4)   | 3.68<br>(3)    | 3.11<br>(3)   | 3.82<br>(4)   | 3.98<br>(3)   | 2.57<br>(2)   | 3.50<br>(3)   | 4.35<br>(3)   | 3.78<br>(3)   |
|                      | School | 3.91<br>(4)   | 3.80<br>(3)    | 3.40<br>(3)   | 4.04<br>(4)   | 4.19<br>(3)   | 2.72<br>(3)   | 3.78<br>(3)   | 4.40<br>(3)   | 3.51<br>(3)   |
| N                    |        | 789 520       | 55 600         | 15 349        | 22 989        | 26 104        | 68 274        | 190 525       | 304 231       | 106 447       |

**Notes:** Sample includes NYC public school students in districts 1-32 with home and school address data and student-level demographic data. Students for whom a substantial proportion of their food environment lies outside of the city boundaries (those whose home or school is within half a mile from city borders) are excluded.
