# Supplementary material for: Disparities in food access around homes and schools for New York City children
Source: PubMed Central journal article supplement (PMC6561543; doi:10.1371/journal.pone.0217341), 2019-06-12
Supplement: pone.0217341.s005.pdf [file pone.0217341.s005.pdf]

**S5 Table.** Mean nearest distance (in ft.) to food facilities from home and school, race and poverty interactions, Grade K-5, AY2013

|                      |        | Overall           | Not low-income    |                   |                   |                   | Low-income        |                   |                  |                   |
|----------------------|--------|-------------------|-------------------|-------------------|-------------------|-------------------|-------------------|-------------------|------------------|-------------------|
|                      |        | Total             | White             | Black             | Hispanic          | Asian             | White             | Black             | Hispanic         | Asian             |
| Corner stores        | Home   | 632.53<br>(666)   | 1061.54<br>(1085) | 740.21<br>(578)   | 648.79<br>(633)   | 753.72<br>(709)   | 960.00<br>(958)   | 582.74<br>(493)   | 451.95<br>(441)  | 661.86<br>(608)   |
|                      | School | 675.51<br>(681)   | 1009.34<br>(1152) | 755.32<br>(646)   | 683.32<br>(651)   | 739.95<br>(707)   | 954.34<br>(1006)  | 632.92<br>(510)   | 535.94<br>(449)  | 701.73<br>(642)   |
| Fast-food outlets    | Home   | 698.11<br>(600)   | 944.30<br>(900)   | 815.96<br>(587)   | 688.74<br>(590)   | 745.45<br>(647)   | 945.90<br>(815)   | 713.79<br>(516)   | 563.16<br>(447)  | 702.98<br>(553)   |
|                      | School | 707.84<br>(526)   | 843.05<br>(679)   | 804.19<br>(570)   | 684.03<br>(509)   | 716.24<br>(594)   | 895.43<br>(637)   | 747.89<br>(492)   | 598.88<br>(418)  | 741.72<br>(565)   |
| Wait-service outlets | Home   | 1057.04<br>(899)  | 1081.96<br>(1018) | 1401.69<br>(1028) | 926.14<br>(784)   | 905.45<br>(755)   | 1187.36<br>(995)  | 1418.74<br>(1076) | 888.17<br>(733)  | 900.68<br>(698)   |
|                      | School | 1064.15<br>(834)  | 999.88<br>(870)   | 1298.63<br>(1007) | 925.00<br>(714)   | 936.73<br>(744)   | 1141.96<br>(805)  | 1400.40<br>(1054) | 922.08<br>(676)  | 988.80<br>(689)   |
| Any supermarkets     | Home   | 1523.21<br>(1174) | 2064.95<br>(1847) | 1660.51<br>(1090) | 1539.86<br>(1197) | 1623.37<br>(1172) | 2070.25<br>(1586) | 1467.37<br>(962)  | 1287.36<br>(901) | 1507.53<br>(1008) |
|                      | School | 1526.48<br>(1116) | 1941.40<br>(1719) | 1723.58<br>(1117) | 1537.06<br>(1146) | 1612.91<br>(1103) | 2019.78<br>(1454) | 1509.57<br>(951)  | 1296.49<br>(851) | 1556.11<br>(1040) |
| N                    |        | 365 255           | 34 262            | 9 210             | 16 299            | 18 822            | 28 879            | 75 763            | 139 401          | 42 690            |

**Notes:** Sample includes NYC public school K-5 students in districts 1-32 with home and school address data and student-level demographic data. Students for whom a substantial proportion of their food environment lies outside of the city boundaries (those whose home or school is within half a mile from city borders) are excluded.
