# Supplementary material for: Disparities in food access around homes and schools for New York City children
Source: PubMed Central journal article supplement (PMC6561543; doi:10.1371/journal.pone.0217341), 2019-06-12
Supplement: pone.0217341.s006.pdf [file pone.0217341.s006.pdf]

**S6 Table.** Mean count within 0.25 miles of food facilities from home and school, race and poverty interactions, Grade K-5, AY2013

|                      |        | Overall       | Not low-income |               |               |               | Low-income    |               |               |               |
|----------------------|--------|---------------|----------------|---------------|---------------|---------------|---------------|---------------|---------------|---------------|
|                      |        | Total         | White          | Black         | Hispanic      | Asian         | White         | Black         | Hispanic      | Asian         |
| Corner stores        | Home   | 15.96<br>(13) | 8.16<br>(8)    | 10.95<br>(10) | 14.90<br>(12) | 15.50<br>(18) | 9.74<br>(10)  | 14.70<br>(11) | 20.26<br>(13) | 16.26<br>(17) |
|                      | School | 15.54<br>(14) | 8.71<br>(9)    | 10.81<br>(10) | 15.07<br>(13) | 17.11<br>(22) | 9.54<br>(10)  | 14.08<br>(11) | 19.47<br>(13) | 15.38<br>(18) |
| Fast-food outlets    | Home   | 18.06<br>(19) | 19.91<br>(27)  | 13.28<br>(16) | 19.92<br>(22) | 23.25<br>(31) | 12.61<br>(17) | 13.78<br>(12) | 19.89<br>(16) | 19.94<br>(24) |
|                      | School | 18.23<br>(20) | 20.47<br>(25)  | 13.47<br>(16) | 20.98<br>(23) | 24.15<br>(33) | 13.14<br>(17) | 13.62<br>(14) | 20.25<br>(18) | 18.85<br>(25) |
| Wait-service outlets | Home   | 8.83<br>(17)  | 17.02<br>(26)  | 4.84<br>(12)  | 11.29<br>(18) | 17.25<br>(30) | 7.77<br>(15)  | 3.13<br>(7)   | 7.85<br>(11)  | 12.22<br>(22) |
|                      | School | 9.75<br>(18)  | 18.98<br>(28)  | 6.74<br>(16)  | 13.09<br>(21) | 18.88<br>(32) | 8.39<br>(16)  | 4.20<br>(11)  | 8.78<br>(13)  | 11.61<br>(22) |
| Any supermarkets     | Home   | 1.23<br>(1)   | 1.21<br>(2)    | 0.94<br>(1)   | 1.24<br>(1)   | 1.29<br>(2)   | 0.80<br>(1)   | 1.11<br>(1)   | 1.40<br>(1)   | 1.22<br>(1)   |
|                      | School | 1.21<br>(1)   | 1.35<br>(2)    | 0.96<br>(1)   | 1.23<br>(1)   | 1.33<br>(2)   | 0.76<br>(1)   | 1.11<br>(1)   | 1.35<br>(1)   | 1.14<br>(2)   |
| N                    |        | 365 255       | 34 262         | 9 210         | 16 299        | 18 822        | 28 879        | 75 763        | 139 401       | 42 690        |

**Notes:** Sample includes NYC public school K-5 students in districts 1-32 with home and school address data and student-level demographic data. Students for whom a substantial proportion of their food environment lies outside of the city boundaries (those whose home or school is within half a mile from city borders) are excluded.
