# Supplementary material for: Disparities in food access around homes and schools for New York City children
Source: PubMed Central journal article supplement (PMC6561543; doi:10.1371/journal.pone.0217341), 2019-06-12
Supplement: pone.0217341.s007.pdf [file pone.0217341.s007.pdf]

**S7 Table.** Mean count within 0.1 miles of food facilities from home and school, race and poverty interactions, Grade K-5, AY2013

|                      |        | Overall     | Not low-income |             |             |              | Low-income  |             |             |             |
|----------------------|--------|-------------|----------------|-------------|-------------|--------------|-------------|-------------|-------------|-------------|
|                      |        | Total       | White          | Black       | Hispanic    | Asian        | White       | Black       | Hispanic    | Asian       |
| Corner stores        | Home   | 2.16<br>(4) | 1.44<br>(3)    | 1.79<br>(3) | 1.94<br>(3) | 3.35<br>(6)  | 1.91<br>(3) | 2.07<br>(3) | 1.92<br>(4) | 3.46<br>(6) |
|                      | School | 3.54<br>(4) | 2.01<br>(3)    | 2.38<br>(3) | 3.06<br>(4) | 4.33<br>(7)  | 2.04<br>(3) | 3.40<br>(4) | 4.31<br>(4) | 3.58<br>(5) |
| Fast-food outlets    | Home   | 2.48<br>(6) | 3.46<br>(8)    | 2.07<br>(5) | 2.72<br>(6) | 4.57<br>(9)  | 2.29<br>(5) | 1.96<br>(4) | 1.93<br>(4) | 3.64<br>(7) |
|                      | School | 3.74<br>(6) | 4.12<br>(6)    | 2.79<br>(5) | 4.18<br>(6) | 5.42<br>(9)  | 2.40<br>(4) | 2.92<br>(4) | 4.18<br>(5) | 3.67<br>(6) |
| Wait-service outlets | Home   | 1.38<br>(5) | 2.92<br>(7)    | 0.78<br>(3) | 1.75<br>(5) | 3.74<br>(10) | 1.45<br>(4) | 0.37<br>(2) | 0.91<br>(3) | 2.40<br>(7) |
|                      | School | 2.13<br>(5) | 4.27<br>(8)    | 1.54<br>(4) | 2.68<br>(5) | 4.70<br>(10) | 1.63<br>(4) | 0.92<br>(3) | 1.82<br>(4) | 2.68<br>(7) |
| Any supermarkets     | Home   | 0.15<br>(0) | 0.19<br>(1)    | 0.14<br>(0) | 0.15<br>(0) | 0.23<br>(1)  | 0.13<br>(0) | 0.15<br>(0) | 0.11<br>(0) | 0.20<br>(1) |
|                      | School | 0.28<br>(1) | 0.31<br>(1)    | 0.19<br>(0) | 0.27<br>(1) | 0.27<br>(1)  | 0.20<br>(0) | 0.25<br>(1) | 0.33<br>(1) | 0.24<br>(0) |
| N                    |        | 365 255     | 34 262         | 9 210       | 16 299      | 18 822       | 28 879      | 75 763      | 139 401     | 42 690      |

**Notes:** Sample includes NYC public school K-5 students in districts 1-32 with home and school address data and student-level demographic data. Students for whom a substantial proportion of their food environment lies outside of the city boundaries (those whose home or school is within half a mile from city borders) are excluded.
