# Supplementary material for: Disparities in food access around homes and schools for New York City children
Source: PubMed Central journal article supplement (PMC6561543; doi:10.1371/journal.pone.0217341), 2019-06-12
Supplement: pone.0217341.s008.pdf [file pone.0217341.s008.pdf]

**S8 Table.** Mean count within 0.5 miles of food facilities from home and school, race and poverty interactions, Grade K-5, AY2013

|                      |        | Overall       | Not low-income |               |               |               | Low-income    |               |               |               |
|----------------------|--------|---------------|----------------|---------------|---------------|---------------|---------------|---------------|---------------|---------------|
|                      |        | Total         | White          | Black         | Hispanic      | Asian         | White         | Black         | Hispanic      | Asian         |
| Corner stores        | Home   | 49.74<br>(36) | 27.19<br>(24)  | 36.59<br>(28) | 47.23<br>(34) | 47.68<br>(47) | 30.76<br>(28) | 47.53<br>(31) | 61.63<br>(35) | 50.46<br>(43) |
|                      | School | 49.20<br>(36) | 28.06<br>(24)  | 35.32<br>(27) | 48.06<br>(35) | 49.78<br>(52) | 30.99<br>(27) | 46.47<br>(30) | 60.93<br>(35) | 48.24<br>(43) |
| Fast-food outlets    | Home   | 49.29<br>(56) | 67.02<br>(85)  | 45.90<br>(46) | 65.08<br>(62) | 76.23<br>(90) | 41.52<br>(50) | 47.37<br>(35) | 63.01<br>(42) | 67.32<br>(69) |
|                      | School | 60.75<br>(58) | 71.24<br>(83)  | 49.89<br>(51) | 68.76<br>(64) | 77.42<br>(90) | 44.15<br>(51) | 48.99<br>(41) | 64.41<br>(47) | 64.46<br>(70) |
| Wait-service outlets | Home   | 29.04<br>(48) | 55.43<br>(79)  | 16.61<br>(37) | 36.72<br>(54) | 53.57<br>(82) | 24.96<br>(42) | 11.76<br>(23) | 25.89<br>(32) | 40.49<br>(59) |
|                      | School | 31.83<br>(53) | 60.96<br>(81)  | 22.90<br>(47) | 41.61<br>(58) | 57.24<br>(86) | 28.16<br>(46) | 14.68<br>(31) | 28.19<br>(38) | 40.30<br>(62) |
| Any supermarkets     | Home   | 3.91<br>(3)   | 3.85<br>(4)    | 3.16<br>(3)   | 3.95<br>(3)   | 4.17<br>(4)   | 2.60<br>(3)   | 3.59<br>(2)   | 4.38<br>(3)   | 3.93<br>(3)   |
|                      | School | 3.96<br>(3)   | 3.96<br>(4)    | 3.20<br>(3)   | 4.11<br>(3)   | 4.45<br>(4)   | 2.79<br>(3)   | 3.51<br>(2)   | 4.42<br>(3)   | 3.92<br>(3)   |
| N                    |        | 365 255       | 34 262         | 9 210         | 16 299        | 18 822        | 28 879        | 75 763        | 139 401       | 42 690        |

**Notes:** Sample includes NYC public school K-5 students in districts 1-32 with home and school address data and student-level demographic data. Students for whom a substantial proportion of their food environment lies outside of the city boundaries (those whose home or school is within half a mile from city borders) are excluded.
