# Supplementary material for: Disparities in food access around homes and schools for New York City children
Source: PubMed Central journal article supplement (PMC6561543; doi:10.1371/journal.pone.0217341), 2019-06-12
Supplement: pone.0217341.s009.pdf [file pone.0217341.s009.pdf]

**S9 Table.** Mean nearest distance (in ft.) to food facilities from home and school, race and poverty interactions, Grade 6-8, AY2013

|                      |        | Overall           | Not low-income    |                   |                   |                   | Low-income        |                   |                  |                   |
|----------------------|--------|-------------------|-------------------|-------------------|-------------------|-------------------|-------------------|-------------------|------------------|-------------------|
|                      |        | Total             | White             | Black             | Hispanic          | Asian             | White             | Black             | Hispanic         | Asian             |
| Corner stores        | Home   | 659.78<br>(691)   | 1270.98<br>(1241) | 803.54<br>(658)   | 791.55<br>(776)   | 932.44<br>(824)   | 1038.47<br>(1039) | 609.80<br>(509)   | 472.38<br>(456)  | 696.06<br>(618)   |
|                      | School | 721.02<br>(624)   | 1145.47<br>(1026) | 799.35<br>(658)   | 826.79<br>(691)   | 967.58<br>(682)   | 1059.09<br>(858)  | 646.34<br>(516)   | 561.63<br>(462)  | 841.78<br>(563)   |
| Fast-food outlets    | Home   | 724.62<br>(611)   | 1108.12<br>(1001) | 860.18<br>(622)   | 800.14<br>(679)   | 901.51<br>(738)   | 987.87<br>(842)   | 729.68<br>(522)   | 581.00<br>(457)  | 732.76<br>(573)   |
|                      | School | 744.97<br>(578)   | 1051.26<br>(1007) | 787.22<br>(598)   | 802.23<br>(668)   | 900.22<br>(642)   | 994.80<br>(826)   | 713.55<br>(462)   | 624.45<br>(439)  | 810.75<br>(523)   |
| Wait-service outlets | Home   | 1124.46<br>(929)  | 1269.00<br>(1117) | 1436.75<br>(1030) | 1067.48<br>(920)  | 1053.24<br>(824)  | 1232.56<br>(1013) | 1455.81<br>(1073) | 920.85<br>(757)  | 949.30<br>(725)   |
|                      | School | 1105.69<br>(834)  | 1231.26<br>(1059) | 1274.91<br>(982)  | 1072.33<br>(829)  | 1184.23<br>(835)  | 1252.82<br>(874)  | 1280.93<br>(1002) | 939.38<br>(668)  | 1078.81<br>(653)  |
| Any supermarkets     | Home   | 1562.01<br>(1193) | 2350.83<br>(1985) | 1719.95<br>(1090) | 1768.88<br>(1382) | 1866.14<br>(1348) | 2155.25<br>(1686) | 1502.97<br>(967)  | 1310.22<br>(938) | 1564.22<br>(1033) |
|                      | School | 1632.64<br>(1224) | 2331.35<br>(2341) | 1722.26<br>(1113) | 1760.92<br>(1383) | 1929.43<br>(1329) | 2206.38<br>(1832) | 1558.19<br>(949)  | 1374.04<br>(883) | 1749.84<br>(999)  |
| N                    |        | 176 770           | 10 386            | 2 661             | 3 350             | 3 878             | 16 326            | 45 223            | 69 727           | 25 219            |

**Notes:** Sample includes NYC public school 6-8 grade students in districts 1-32 with home and school address data and student-level demographic data. Students for whom a substantial proportion of their food environment lies outside of the city boundaries (those whose home or school is within half a mile from city borders) are excluded.
