# Supplementary material for: Disparities in food access around homes and schools for New York City children
Source: PubMed Central journal article supplement (PMC6561543; doi:10.1371/journal.pone.0217341), 2019-06-12
Supplement: pone.0217341.s010.pdf [file pone.0217341.s010.pdf]

**S10 Table.** Mean count within 0.25 miles of food facilities from home and school, race and poverty interactions, Grade 6-8, AY2013

|                      |        | Overall       | Not low-income |               |               |               | Low-income    |               |               |               |
|----------------------|--------|---------------|----------------|---------------|---------------|---------------|---------------|---------------|---------------|---------------|
|                      |        | Total         | White          | Black         | Hispanic      | Asian         | White         | Black         | Hispanic      | Asian         |
| Corner stores        | Home   | 15.31<br>(13) | 6.86<br>(8)    | 10.41<br>(10) | 12.09<br>(12) | 10.61<br>(14) | 9.21<br>(10)  | 14.05<br>(11) | 19.64<br>(13) | 14.71<br>(15) |
|                      | School | 13.19<br>(12) | 8.20<br>(9)    | 10.56<br>(10) | 11.21<br>(10) | 8.53<br>(9)   | 8.12<br>(9)   | 13.25<br>(10) | 16.67<br>(12) | 10.04<br>(13) |
| Fast-food outlets    | Home   | 16.67<br>(18) | 17.04<br>(26)  | 12.81<br>(16) | 17.16<br>(21) | 17.94<br>(26) | 12.34<br>(17) | 13.25<br>(12) | 19.32<br>(16) | 18.31<br>(23) |
|                      | School | 16.35<br>(19) | 18.95<br>(25)  | 16.43<br>(21) | 18.22<br>(22) | 16.10<br>(21) | 12.17<br>(18) | 14.62<br>(15) | 18.37<br>(18) | 15.25<br>(21) |
| Wait-service outlets | Home   | 7.39<br>(14)  | 14.41<br>(25)  | 4.77<br>(13)  | 10.27<br>(18) | 13.11<br>(25) | 7.41<br>(15)  | 2.92<br>(7)   | 7.66<br>(11)  | 10.76<br>(20) |
|                      | School | 8.13<br>(15)  | 15.72<br>(24)  | 8.92<br>(18)  | 12.28<br>(20) | 11.20<br>(19) | 7.82<br>(16)  | 5.14<br>(12)  | 8.26<br>(14)  | 9.15<br>(17)  |
| Any supermarkets     | Home   | 1.17<br>(1)   | 1.07<br>(2)    | 0.91<br>(1)   | 1.11<br>(1)   | 1.06<br>(1)   | 0.76<br>(1)   | 1.06<br>(1)   | 1.38<br>(1)   | 1.12<br>(1)   |
|                      | School | 1.07<br>(1)   | 1.08<br>(2)    | 0.92<br>(1)   | 1.04<br>(1)   | 0.92<br>(1)   | 0.67<br>(1)   | 1.03<br>(1)   | 1.27<br>(1)   | 0.89<br>(1)   |
| N                    |        | 176 770       | 10 386         | 2 661         | 3 350         | 3 878         | 16 326        | 45 223        | 69 727        | 25 219        |

**Notes:** Sample includes NYC public school 6-8 grade students in districts 1-32 with home and school address data and student-level demographic data. Students for whom a substantial proportion of their food environment lies outside of the city boundaries (those whose home or school is within half a mile from city borders) are excluded.
