# Supplementary material for: Disparities in food access around homes and schools for New York City children
Source: PubMed Central journal article supplement (PMC6561543; doi:10.1371/journal.pone.0217341), 2019-06-12
Supplement: pone.0217341.s011.pdf [file pone.0217341.s011.pdf]

**S11 Table.** Mean count within 0.1 miles of food facilities from home and school, race and poverty interactions, Grade 6-8, AY2013

|                      |        | Overall     | Not low-income |             |             |             | Low-income  |             |             |             |
|----------------------|--------|-------------|----------------|-------------|-------------|-------------|-------------|-------------|-------------|-------------|
|                      |        | Total       | White          | Black       | Hispanic    | Asian       | White       | Black       | Hispanic    | Asian       |
| Corner stores        | Home   | 2.00<br>(4) | 1.15<br>(2)    | 1.65<br>(3) | 1.64<br>(3) | 2.14<br>(4) | 1.78<br>(3) | 2.05<br>(3) | 1.78<br>(3) | 3.05<br>(5) |
|                      | School | 2.74<br>(3) | 1.89<br>(3)    | 2.14<br>(3) | 2.29<br>(3) | 1.60<br>(3) | 1.45<br>(2) | 2.68<br>(3) | 3.58<br>(4) | 1.98<br>(3) |
| Fast-food outlets    | Home   | 2.17<br>(5) | 2.68<br>(6)    | 1.95<br>(5) | 2.36<br>(6) | 3.19<br>(7) | 2.16<br>(5) | 1.92<br>(4) | 1.79<br>(4) | 3.31<br>(7) |
|                      | School | 3.51<br>(5) | 4.70<br>(7)    | 3.82<br>(6) | 4.04<br>(6) | 3.37<br>(6) | 2.37<br>(5) | 3.14<br>(5) | 3.90<br>(5) | 3.23<br>(6) |
| Wait-service outlets | Home   | 1.06<br>(4) | 2.14<br>(6)    | 0.80<br>(3) | 1.57<br>(5) | 2.48<br>(7) | 1.28<br>(4) | 0.35<br>(2) | 0.84<br>(3) | 2.09<br>(6) |
|                      | School | 1.82<br>(4) | 4.38<br>(7)    | 2.16<br>(5) | 2.85<br>(6) | 2.59<br>(6) | 1.52<br>(4) | 1.24<br>(4) | 1.76<br>(4) | 1.90<br>(5) |
| Any supermarkets     | Home   | 0.13<br>(0) | 0.15<br>(0)    | 0.12<br>(0) | 0.13<br>(0) | 0.17<br>(1) | 0.13<br>(0) | 0.14<br>(0) | 0.11<br>(0) | 0.18<br>(1) |
|                      | School | 0.23<br>(1) | 0.18<br>(1)    | 0.16<br>(0) | 0.24<br>(1) | 0.19<br>(1) | 0.12<br>(0) | 0.23<br>(0) | 0.28<br>(1) | 0.17<br>(0) |
| N                    |        | 176 770     | 10 386         | 2 661       | 3 350       | 3 878       | 16 326      | 45 223      | 69 727      | 25 219      |

**Notes:** Sample includes NYC public school 6-8 grade students in districts 1-32 with home and school address data and student-level demographic data. Students for whom a substantial proportion of their food environment lies outside of the city boundaries (those whose home or school is within half a mile from city borders) are excluded.
