# Supplementary material for: Disparities in food access around homes and schools for New York City children
Source: PubMed Central journal article supplement (PMC6561543; doi:10.1371/journal.pone.0217341), 2019-06-12
Supplement: pone.0217341.s012.pdf [file pone.0217341.s012.pdf]

**S12 Table.** Mean count within 0.5 miles of food facilities from home and school, race and poverty interactions, Grade 6-8, AY2013

|                      |        | Overall       | Not low-income |               |               |               | Low-income    |               |               |               |
|----------------------|--------|---------------|----------------|---------------|---------------|---------------|---------------|---------------|---------------|---------------|
|                      |        | Total         | White          | Black         | Hispanic      | Asian         | White         | Black         | Hispanic      | Asian         |
| Corner stores        | Home   | 48.01<br>(35) | 22.99<br>(24)  | 34.67<br>(28) | 39.00<br>(33) | 34.22<br>(37) | 29.36<br>(28) | 45.57<br>(30) | 60.09<br>(35) | 46.10<br>(40) |
|                      | School | 45.96<br>(34) | 28.04<br>(24)  | 36.91<br>(30) | 39.23<br>(31) | 31.21<br>(28) | 30.20<br>(27) | 44.87<br>(32) | 57.63<br>(34) | 37.35<br>(34) |
| Fast-food outlets    | Home   | 55.17<br>(51) | 58.61<br>(84)  | 44.47<br>(48) | 57.74<br>(63) | 61.16<br>(80) | 40.44<br>(51) | 45.73<br>(34) | 61.98<br>(43) | 61.26<br>(67) |
|                      | School | 56.93<br>(53) | 66.05<br>(80)  | 56.75<br>(63) | 62.26<br>(67) | 56.37<br>(64) | 44.40<br>(52) | 50.47<br>(43) | 63.24<br>(47) | 54.82<br>(63) |
| Wait-service outlets | Home   | 24.77<br>(42) | 47.85<br>(77)  | 16.48<br>(39) | 34.47<br>(55) | 42.67<br>(71) | 24.08<br>(42) | 10.98<br>(22) | 25.30<br>(32) | 35.73<br>(56) |
|                      | School | 28.57<br>(46) | 52.68<br>(72)  | 30.01<br>(54) | 40.99<br>(61) | 40.40<br>(58) | 27.40<br>(45) | 18.06<br>(35) | 28.72<br>(39) | 34.17<br>(56) |
| Any supermarkets     | Home   | 3.73<br>(3)   | 3.39<br>(4)    | 3.05<br>(3)   | 3.49<br>(3)   | 3.44<br>(4)   | 2.50<br>(3)   | 3.46<br>(2)   | 4.32<br>(3)   | 3.66<br>(3)   |
|                      | School | 3.68<br>(3)   | 3.73<br>(4)    | 3.37<br>(3)   | 3.71<br>(3)   | 3.34<br>(3)   | 2.69<br>(3)   | 3.49<br>(3)   | 4.21<br>(3)   | 3.25<br>(3)   |
| N                    |        | 176 770       | 10 386         | 2 661         | 3 350         | 3 878         | 16 326        | 45 223        | 69 727        | 25 219        |

**Notes:** Sample includes NYC public school 6-8 grade students in districts 1-32 with home and school address data and student-level demographic data. Students for whom a substantial proportion of their food environment lies outside of the city boundaries (those whose home or school is within half a mile from city borders) are excluded.
