# Supplementary material for: Disparities in food access around homes and schools for New York City children
Source: PubMed Central journal article supplement (PMC6561543; doi:10.1371/journal.pone.0217341), 2019-06-12
Supplement: pone.0217341.s013.pdf [file pone.0217341.s013.pdf]

**S13 Table.** Mean nearest distance (in ft.) to food facilities from home and school, race and poverty interactions, Grade 9-12, AY2013

|                      |        | Overall           | Not low-income    |                   |                   |                   | Low-income        |                   |                  |                   |
|----------------------|--------|-------------------|-------------------|-------------------|-------------------|-------------------|-------------------|-------------------|------------------|-------------------|
|                      |        | Total             | White             | Black             | Hispanic          | Asian             | White             | Black             | Hispanic         | Asian             |
| Corner stores        | Home   | 641.66<br>(645)   | 1218.14<br>(1158) | 775.39<br>(596)   | 795.39<br>(772)   | 974.99<br>(860)   | 974.84<br>(971)   | 615.95<br>(509)   | 472.64<br>(447)  | 686.75<br>(606)   |
|                      | School | 827.83<br>(718)   | 1322.98<br>(932)  | 857.44<br>(716)   | 961.19<br>(856)   | 1121.52<br>(864)  | 1234.95<br>(938)  | 694.04<br>(548)   | 669.24<br>(589)  | 1035.79<br>(806)  |
| Fast-food outlets    | Home   | 715.53<br>(588)   | 1073.22<br>(965)  | 871.11<br>(616)   | 808.01<br>(695)   | 927.61<br>(776)   | 944.44<br>(800)   | 737.50<br>(524)   | 582.50<br>(452)  | 724.55<br>(567)   |
|                      | School | 797.59<br>(660)   | 1081.49<br>(854)  | 808.10<br>(695)   | 852.45<br>(770)   | 999.77<br>(749)   | 1131.76<br>(823)  | 703.82<br>(557)   | 669.48<br>(563)  | 978.70<br>(717)   |
| Wait-service outlets | Home   | 1130.31<br>(929)  | 1239.01<br>(1088) | 1486.43<br>(1058) | 1076.35<br>(890)  | 1092.75<br>(854)  | 1182.68<br>(978)  | 1463.84<br>(1070) | 928.61<br>(768)  | 939.95<br>(723)   |
|                      | School | 1096.78<br>(812)  | 1302.82<br>(1015) | 1180.97<br>(892)  | 1087.38<br>(898)  | 1156.82<br>(860)  | 1388.42<br>(939)  | 1110.31<br>(785)  | 937.43<br>(721)  | 1219.72<br>(820)  |
| Any supermarkets     | Home   | 1529.40<br>(1125) | 2305.08<br>(1928) | 1716.68<br>(1091) | 1745.07<br>(1402) | 1913.69<br>(1409) | 2058.5<br>(1550)  | 1492.11<br>(946)  | 1299.30<br>(903) | 1557.45<br>(1030) |
|                      | School | 1796.57<br>(1342) | 2785.99<br>(2350) | 1794.64<br>(1320) | 1958.88<br>(1538) | 2096.42<br>(1354) | 2631.80<br>(1986) | 1561.36<br>(1067) | 1518.41<br>(999) | 2085.60<br>(1226) |
| N                    |        | 247 494           | 10 952            | 3 478             | 3 410             | 3 404             | 23 069            | 69 540            | 95 103           | 38 538            |

**Notes:** Sample includes NYC public school 9-12 grade students in districts 1-32 with home and school address data and student-level demographic data. Students for whom a substantial proportion of their food environment lies outside of the city boundaries (those whose home or school is within half a mile from city borders) are excluded.
