# Supplementary material for: Disparities in food access around homes and schools for New York City children
Source: PubMed Central journal article supplement (PMC6561543; doi:10.1371/journal.pone.0217341), 2019-06-12
Supplement: pone.0217341.s014.pdf [file pone.0217341.s014.pdf]

**S14 Table.** Mean count within 0.25 miles of food facilities from home and school, race and poverty interactions, Grade 9-12, AY2013

|                      |        | Overall       | Not low-income |               |               |               | Low-income    |               |               |               |
|----------------------|--------|---------------|----------------|---------------|---------------|---------------|---------------|---------------|---------------|---------------|
|                      |        | Total         | White          | Black         | Hispanic      | Asian         | White         | Black         | Hispanic      | Asian         |
| Corner stores        | Home   | 15.44<br>(13) | 7.16<br>(8)    | 10.49<br>(10) | 12.58<br>(12) | 11.01<br>(15) | 9.55<br>(10)  | 13.94<br>(11) | 19.56<br>(13) | 14.96<br>(15) |
|                      | School | 11.62<br>(12) | 6.32<br>(8)    | 10.74<br>(11) | 10.74<br>(12) | 10.38<br>(15) | 7.06<br>(9)   | 12.57<br>(11) | 13.68<br>(12) | 9.35<br>(12)  |
| Fast-food outlets    | Home   | 16.66<br>(18) | 17.40<br>(27)  | 12.18<br>(15) | 17.03<br>(21) | 18.17<br>(28) | 12.43<br>(17) | 13.27<br>(12) | 19.41<br>(16) | 18.54<br>(23) |
|                      | School | 22.06<br>(29) | 17.54<br>(30)  | 21.79<br>(29) | 23.61<br>(32) | 29.49<br>(49) | 13.46<br>(23) | 22.36<br>(27) | 25.63<br>(31) | 18.36<br>(28) |
| Wait-service outlets | Home   | 7.25<br>(14)  | 14.45<br>(25)  | 4.13<br>(11)  | 9.78<br>(19)  | 13.11<br>(25) | 7.48<br>(14)  | 2.91<br>(7)   | 7.80<br>(12)  | 11.11<br>(20) |
|                      | School | 13.09<br>(24) | 14.17<br>(27)  | 13.25<br>(26) | 16.90<br>(30) | 18.93<br>(33) | 8.35<br>(19)  | 11.86<br>(23) | 15.55<br>(26) | 10.89<br>(20) |
| Any supermarkets     | Home   | 1.16<br>(1)   | 1.08<br>(2)    | 0.89<br>(1)   | 1.10<br>(1)   | 1.06<br>(1)   | 0.79<br>(1)   | 1.04<br>(1)   | 1.38<br>(1)   | 1.12<br>(1)   |
|                      | School | 1.05<br>(1)   | 0.97<br>(1)    | 1.11<br>(1)   | 1.11<br>(1)   | 0.85<br>(1)   | 0.62<br>(1)   | 1.17<br>(1)   | 1.22<br>(1)   | 0.69<br>(1)   |
| N                    |        | 247 494       | 10 952         | 3 478         | 3 410         | 3 404         | 23 069        | 69 540        | 95 103        | 38 538        |

**Notes:** Sample includes NYC public school 9-12 grade students in districts 1-32 with home and school address data and student-level demographic data. Students for whom a substantial proportion of their food environment lies outside of the city boundaries (those whose home or school is within half a mile from city borders) are excluded.
