# Supplementary material for: Disparities in food access around homes and schools for New York City children
Source: PubMed Central journal article supplement (PMC6561543; doi:10.1371/journal.pone.0217341), 2019-06-12
Supplement: pone.0217341.s016.pdf [file pone.0217341.s016.pdf]

**S16 Table.** Mean count within 0.5 miles of food facilities from home and school, race and poverty interactions, Grade 9-12, AY2013

|                      |        | Overall       | Not low-income |               |                |                | Low-income    |               |                |               |
|----------------------|--------|---------------|----------------|---------------|----------------|----------------|---------------|---------------|----------------|---------------|
|                      |        | Total         | White          | Black         | Hispanic       | Asian          | White         | Black         | Hispanic       | Asian         |
| Corner stores        | Home   | 48.53<br>(35) | 23.90<br>(24)  | 35.46<br>(28) | 40.32<br>(34)  | 35.28<br>(41)  | 30.40<br>(27) | 45.25<br>(30) | 60.02<br>(35)  | 47.00<br>(40) |
|                      | School | 40.66<br>(33) | 22.57<br>(23)  | 38.02<br>(31) | 36.58<br>(33)  | 31.56<br>(34)  | 25.62<br>(25) | 44.29<br>(32) | 47.98<br>(34)  | 31.57<br>(32) |
| Fast-food outlets    | Home   | 55.41<br>(51) | 59.85<br>(85)  | 43.04<br>(44) | 57.02<br>(65)  | 62.33<br>(82)  | 41.19<br>(50) | 45.73<br>(35) | 62.53<br>(44)  | 62.90<br>(66) |
|                      | School | 81.73<br>(97) | 70.57<br>(92)  | 81.95<br>(98) | 88.72<br>(105) | 90.45<br>(112) | 53.71<br>(76) | 82.24<br>(94) | 93.22<br>(105) | 70.96<br>(89) |
| Wait-service outlets | Home   | 24.43<br>(42) | 47.99<br>(78)  | 14.62<br>(35) | 32.45<br>(56)  | 43.54<br>(71)  | 24.56<br>(42) | 10.85<br>(22) | 25.89<br>(34)  | 37.02<br>(56) |
|                      | School | 48.61<br>(81) | 50.15<br>(80)  | 48.52<br>(83) | 62.15<br>(92)  | 59.85<br>(89)  | 32.00<br>(62) | 44.40<br>(78) | 57.72<br>(88)  | 41.02<br>(70) |
| Any supermarkets     | Home   | 3.74<br>(3)   | 3.40<br>(4)    | 3.02<br>(3)   | 3.54<br>(3)    | 3.54<br>(4)    | 2.58<br>(3)   | 3.43<br>(2)   | 4.34<br>(3)    | 3.69<br>(3)   |
|                      | School | 3.99<br>(3)   | 3.38<br>(4)    | 3.96<br>(3)   | 4.03<br>(4)    | 3.68<br>(3)    | 2.66<br>(3)   | 4.25<br>(3)   | 4.52<br>(3)    | 3.21<br>(3)   |
| N                    |        | 247 494       | 10 952         | 3 478         | 3 410          | 3 404          | 23 069        | 69 540        | 95 103         | 38 538        |

**Notes:** Sample includes NYC public school 9-12 grade students in districts 1-32 with home and school address data and student-level demographic data. Students for whom a substantial proportion of their food environment lies outside of the city boundaries (those whose home or school is within half a mile from city borders) are excluded.
