# Supplementary material for: Disparities in food access around homes and schools for New York City children
Source: PubMed Central journal article supplement (PMC6561543; doi:10.1371/journal.pone.0217341), 2019-06-12
Supplement: pone.0217341.s017.pdf [file pone.0217341.s017.pdf]

**S17 Table.** Comparison of Mean and Median Measurements on Distance to Nearest Food Outlet and Count of Outlets within 0.25 Miles, AY2013.

|                      |        | Distance to nearest |         | Count within 0.25 miles |         |
|----------------------|--------|---------------------|---------|-------------------------|---------|
|                      |        | Mean                | Median  | Mean                    | Median  |
| Corner stores        | Home   | 641                 | 463     | 15.65                   | 13      |
|                      | School | 733                 | 532     | 13.79                   | 12      |
| Fast-food outlets    | Home   | 710                 | 573     | 17.31                   | 13      |
|                      | School | 744                 | 585     | 19.01                   | 12      |
| Wait-service outlets | Home   | 1095                | 902     | 8.02                    | 3       |
|                      | School | 1084                | 907     | 10.43                   | 3       |
| Any supermarkets     | Home   | 1534                | 1251    | 1.19                    | 1       |
|                      | School | 1635                | 1243    | 1.13                    | 1       |
| N                    |        | 789 520             | 789 520 | 789 520                 | 789 520 |
