# Supplementary material for: Disparities in food access around homes and schools for New York City children
Source: PubMed Central journal article supplement (PMC6561543; doi:10.1371/journal.pone.0217341), 2019-06-12
Supplement: pone.0217341.s018.pdf [file pone.0217341.s018.pdf]

**S18 Table.** P-values of Pair-wise T-tests from Mean Distance to Nearest Food Outlet of All Types, from Home, AY2013

|                                                 | Corner store | Fast food | Wait service | Supermarket |
|-------------------------------------------------|--------------|-----------|--------------|-------------|
| low-income Hispanic vs low-income Asian         | 0.000        | 0.000     | 0.000        | 0.000       |
| low-income Black vs low-income Asian            | 0.000        | 0.005     | 0.000        | 0.000       |
| low-income White vs low-income Asian            | 0.000        | 0.000     | 0.000        | 0.000       |
| non-low-income Asian vs low-income Asian        | 0.000        | 0.000     | 0.001        | 0.000       |
| non-low-income Hispanic vs low-income Asian     | 0.204        | 1.000     | 0.000        | 0.000       |
| non-low-income Black vs low-income Asian        | 0.000        | 0.000     | 0.000        | 0.000       |
| non-low-income White vs low-income Asian        | 0.000        | 0.000     | 0.000        | 0.000       |
| low-income Black vs low-income Hispanic         | 0.000        | 0.000     | 0.000        | 0.000       |
| low-income White vs low-income Hispanic         | 0.000        | 0.000     | 0.000        | 0.000       |
| non-low-income Asian vs low-income Hispanic     | 0.000        | 0.000     | 0.000        | 0.000       |
| non-low-income Hispanic vs low-income Hispanic  | 0.000        | 0.000     | 0.000        | 0.000       |
| non-low-income Black vs low-income Hispanic     | 0.000        | 0.000     | 0.000        | 0.000       |
| non-low-income White vs low-income Hispanic     | 0.000        | 0.000     | 0.000        | 0.000       |
| low-income White vs low-income Black            | 0.000        | 0.000     | 0.000        | 0.000       |
| non-low-income Asian vs low-income Black        | 0.000        | 0.000     | 0.000        | 0.000       |
| non-low-income Hispanic vs low-income Black     | 0.000        | 1.000     | 0.000        | 0.000       |
| non-low-income Black vs low-income Black        | 0.000        | 0.000     | 0.622        | 0.000       |
| non-low-income White vs low-income Black        | 0.000        | 0.000     | 0.000        | 0.000       |
| non-low-income Asian vs low-income White        | 0.000        | 0.000     | 0.000        | 0.000       |
| non-low-income Hispanic vs low-income White     | 0.000        | 0.000     | 0.000        | 0.000       |
| non-low-income Black vs low-income White        | 0.000        | 0.000     | 0.000        | 0.000       |
| non-low-income White vs low-income White        | 0.000        | 0.000     | 0.000        | 0.000       |
| non-low-income Hispanic vs non-low-income Asian | 0.000        | 0.000     | 0.896        | 0.000       |
| non-low-income Black vs non-low-income Asian    | 0.000        | 0.000     | 0.000        | 1.000       |
| non-low-income White vs non-low-income Asian    | 0.000        | 0.000     | 0.000        | 0.000       |
| non-low-income Black vs non-low-income Hispanic | 0.000        | 0.000     | 0.000        | 0.000       |
| non-low-income White vs non-low-income Hispanic | 0.000        | 0.000     | 0.000        | 0.000       |
| non-low-income White vs non-low-income Black    | 0.000        | 0.000     | 0.000        | 0.000       |
