# Supplementary material for: Disparities in food access around homes and schools for New York City children
Source: PubMed Central journal article supplement (PMC6561543; doi:10.1371/journal.pone.0217341), 2019-06-12
Supplement: pone.0217341.s019.pdf [file pone.0217341.s019.pdf]

**S19 Table.** P-values of Pair-wise T-tests from Mean Distance to Nearest Food Outlet of All Types, from School, AY2013

|                                                 | Corner store | Fast food | Wait service | Supermarket |
|-------------------------------------------------|--------------|-----------|--------------|-------------|
| low-income Hispanic vs low-income Asian         | 0.000        | 0.000     | 0.003        | 0.000       |
| low-income Black vs low-income Asian            | 0.001        | 0.112     | 0.039        | 0.019       |
| low-income White vs low-income Asian            | 0.016        | 0.037     | 0.157        | 0.099       |
| non-low-income Asian vs low-income Asian        | 1.000        | 1.000     | 1.000        | 1.000       |
| non-low-income Hispanic vs low-income Asian     | 0.366        | 0.063     | 0.224        | 0.720       |
| non-low-income Black vs low-income Asian        | 1.000        | 1.000     | 0.134        | 1.000       |
| non-low-income White vs low-income Asian        | 0.336        | 1.000     | 1.000        | 1.000       |
| low-income Black vs low-income Hispanic         | 0.002        | 0.000     | 0.000        | 0.001       |
| low-income White vs low-income Hispanic         | 0.000        | 0.000     | 0.000        | 0.000       |
| non-low-income Asian vs low-income Hispanic     | 0.000        | 0.008     | 1.000        | 0.000       |
| non-low-income Hispanic vs low-income Hispanic  | 0.000        | 0.000     | 1.000        | 0.000       |
| non-low-income Black vs low-income Hispanic     | 0.000        | 0.000     | 0.000        | 0.000       |
| non-low-income White vs low-income Hispanic     | 0.000        | 0.000     | 0.675        | 0.000       |
| low-income White vs low-income Black            | 0.000        | 0.000     | 1.000        | 0.001       |
| non-low-income Asian vs low-income Black        | 0.025        | 1.000     | 0.001        | 0.548       |
| non-low-income Hispanic vs low-income Black     | 0.138        | 1.000     | 0.000        | 1.000       |
| non-low-income Black vs low-income Black        | 0.001        | 0.026     | 1.000        | 0.001       |
| non-low-income White vs low-income Black        | 0.000        | 0.034     | 1.000        | 0.022       |
| non-low-income Asian vs low-income White        | 0.028        | 0.018     | 0.035        | 0.027       |
| non-low-income Hispanic vs low-income White     | 0.000        | 0.000     | 0.000        | 0.000       |
| non-low-income Black vs low-income White        | 0.009        | 0.053     | 1.000        | 0.068       |
| non-low-income White vs low-income White        | 1.000        | 1.000     | 0.131        | 1.000       |
| non-low-income Hispanic vs non-low-income Asian | 1.000        | 1.000     | 1.000        | 1.000       |
| non-low-income Black vs non-low-income Asian    | 1.000        | 1.000     | 0.001        | 1.000       |
| non-low-income White vs non-low-income Asian    | 0.067        | 0.516     | 1.000        | 0.310       |
| non-low-income Black vs non-low-income Hispanic | 1.000        | 0.543     | 0.000        | 1.000       |
| non-low-income White vs non-low-income Hispanic | 0.000        | 0.002     | 1.000        | 0.015       |
| non-low-income White vs non-low-income Black    | 0.038        | 1.000     | 1.000        | 0.594       |
