# Supplementary material for: Disparities in food access around homes and schools for New York City children
Source: PubMed Central journal article supplement (PMC6561543; doi:10.1371/journal.pone.0217341), 2019-06-12
Supplement: pone.0217341.s021.pdf [file pone.0217341.s021.pdf]

**S21 Table.** P-values of Pair-wise T-tests from Count of Food Outlets within 0.25 miles, from School, AY2013

|                                                 | Corner store | Fast food | Wait service | Supermarket |
|-------------------------------------------------|--------------|-----------|--------------|-------------|
| low-income Hispanic vs low-income Asian         | 0.000        | 0.105     | 1.000        | 0.000       |
| low-income Black vs low-income Asian            | 1.000        | 1.000     | 0.020        | 0.588       |
| low-income White vs low-income Asian            | 0.001        | 0.003     | 0.283        | 0.088       |
| non-low-income Asian vs low-income Asian        | 1.000        | 1.000     | 0.175        | 1.000       |
| non-low-income Hispanic vs low-income Asian     | 1.000        | 0.772     | 0.400        | 0.044       |
| non-low-income Black vs low-income Asian        | 1.000        | 1.000     | 1.000        | 1.000       |
| non-low-income White vs low-income Asian        | 0.001        | 1.000     | 0.017        | 0.699       |
| low-income Black vs low-income Hispanic         | 0.000        | 0.000     | 0.000        | 0.000       |
| low-income White vs low-income Hispanic         | 0.000        | 0.000     | 0.006        | 0.000       |
| non-low-income Asian vs low-income Hispanic     | 1.000        | 1.000     | 0.741        | 1.000       |
| non-low-income Hispanic vs low-income Hispanic  | 0.000        | 1.000     | 0.011        | 1.000       |
| non-low-income Black vs low-income Hispanic     | 0.000        | 0.000     | 0.041        | 0.000       |
| non-low-income White vs low-income Hispanic     | 0.000        | 1.000     | 0.009        | 1.000       |
| low-income White vs low-income Black            | 0.000        | 0.000     | 1.000        | 0.000       |
| non-low-income Asian vs low-income Black        | 1.000        | 1.000     | 0.024        | 1.000       |
| non-low-income Hispanic vs low-income Black     | 1.000        | 0.017     | 0.000        | 1.000       |
| non-low-income Black vs low-income Black        | 0.000        | 1.000     | 0.385        | 0.396       |
| non-low-income White vs low-income Black        | 0.000        | 1.000     | 0.000        | 1.000       |
| non-low-income Asian vs low-income White        | 0.099        | 0.051     | 0.067        | 0.074       |
| non-low-income Hispanic vs low-income White     | 0.000        | 0.000     | 0.000        | 0.000       |
| non-low-income Black vs low-income White        | 0.002        | 0.046     | 1.000        | 0.001       |
| non-low-income White vs low-income White        | 1.000        | 0.000     | 0.000        | 0.000       |
| non-low-income Hispanic vs non-low-income Asian | 1.000        | 1.000     | 1.000        | 1.000       |
| non-low-income Black vs non-low-income Asian    | 1.000        | 0.580     | 0.087        | 1.000       |
| non-low-income White vs non-low-income Asian    | 0.063        | 1.000     | 1.000        | 1.000       |
| non-low-income Black vs non-low-income Hispanic | 0.000        | 0.000     | 0.000        | 0.040       |
| non-low-income White vs non-low-income Hispanic | 0.000        | 1.000     | 0.237        | 1.000       |
| non-low-income White vs non-low-income Black    | 0.000        | 0.468     | 0.000        | 1.000       |
